# Supplementary material for: Epaxial and hypaxial co-contraction: a mechanism for modulating strike pressure and accuracy during suction feeding in channel catfish
Source: Oxford University Press journal article supplement (doi:10.1242/jeb.244714), 2023-01-30
Supplement: jeb244714supp.pdf [file jeb244714supp.pdf]

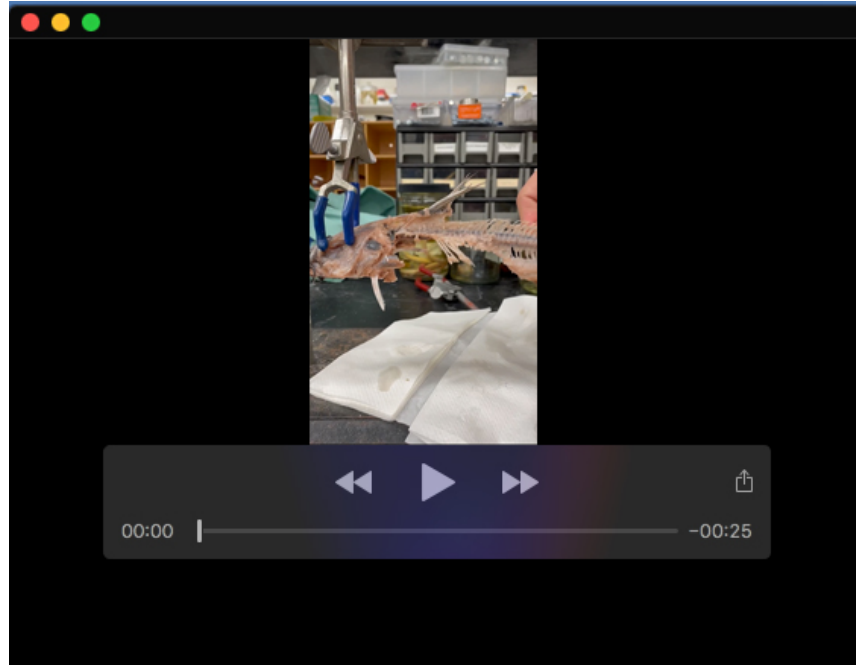

**Movie 1.** Physical manipulation of a dissected channel catfish. The vertebral column is bent ventrally and dorsally to show how axial morphology can limit neurocranial elevation.
